# Supplementary material for: Novel solid forms of oxaprozin: cocrystals and an extended release drug–drug salt of salbutamol
Source: Royal Society of Chemistry journal article supplement (doi:10.1039/c6ra01802e), 2016-01-01
Supplement: c6ra01802e1.pdf [file c6ra01802e1.pdf]

# Novel solid forms of oxaprozin: cocrystals and an extended release drug-drug salt of salbutamol

Srinivasulu Aitipamula,<sup>a,\*</sup> Annie B. H. Wong,<sup>a</sup> Pui Shan Chow,<sup>a</sup> Reginald B.H.Tan<sup>a,b,\*</sup>

<sup>a</sup>Institute of Chemical and Engineering Sciences, A\*STAR (Agency for Science, Technology and Research), 1 Pesek Road, Jurong Island, Singapore 627833, Singapore  
E-mail: srinivasulu\_aitipamula@ices.a-star.edu.sg  
Tel: (65) 6796 3858, Fax: (65) 6316 6183.

<sup>b</sup>Department of Chemical and Biomolecular Engineering, National University of Singapore, 4 Engineering Drive 4, Singapore 117576, Singapore  
E-mail: reginald\_tan@ices.a-star.edu.sg

## Supplementary Data

(8 Pages)

### Contents

- Figure S1 ORTEP drawings of the OXP, salts, and cocrystals  
Figure S2-S3 PXRD patterns of the samples obtained from grinding experiments.  
Figure S4 DVS profiles of BP, BPE, OXP-BP, OXP-BPE, and OXP<sup>-</sup>-2A3P<sup>+</sup>-H salt.  
Figure S5-S7 PXRD patterns of the samples obtained from slurry experiments.  
Figure S8-S10 PXRD patterns of the samples obtained from stability experiments.  
Figs. S11-S13 PXRD patterns of the samples obtained from dissolution experiments.

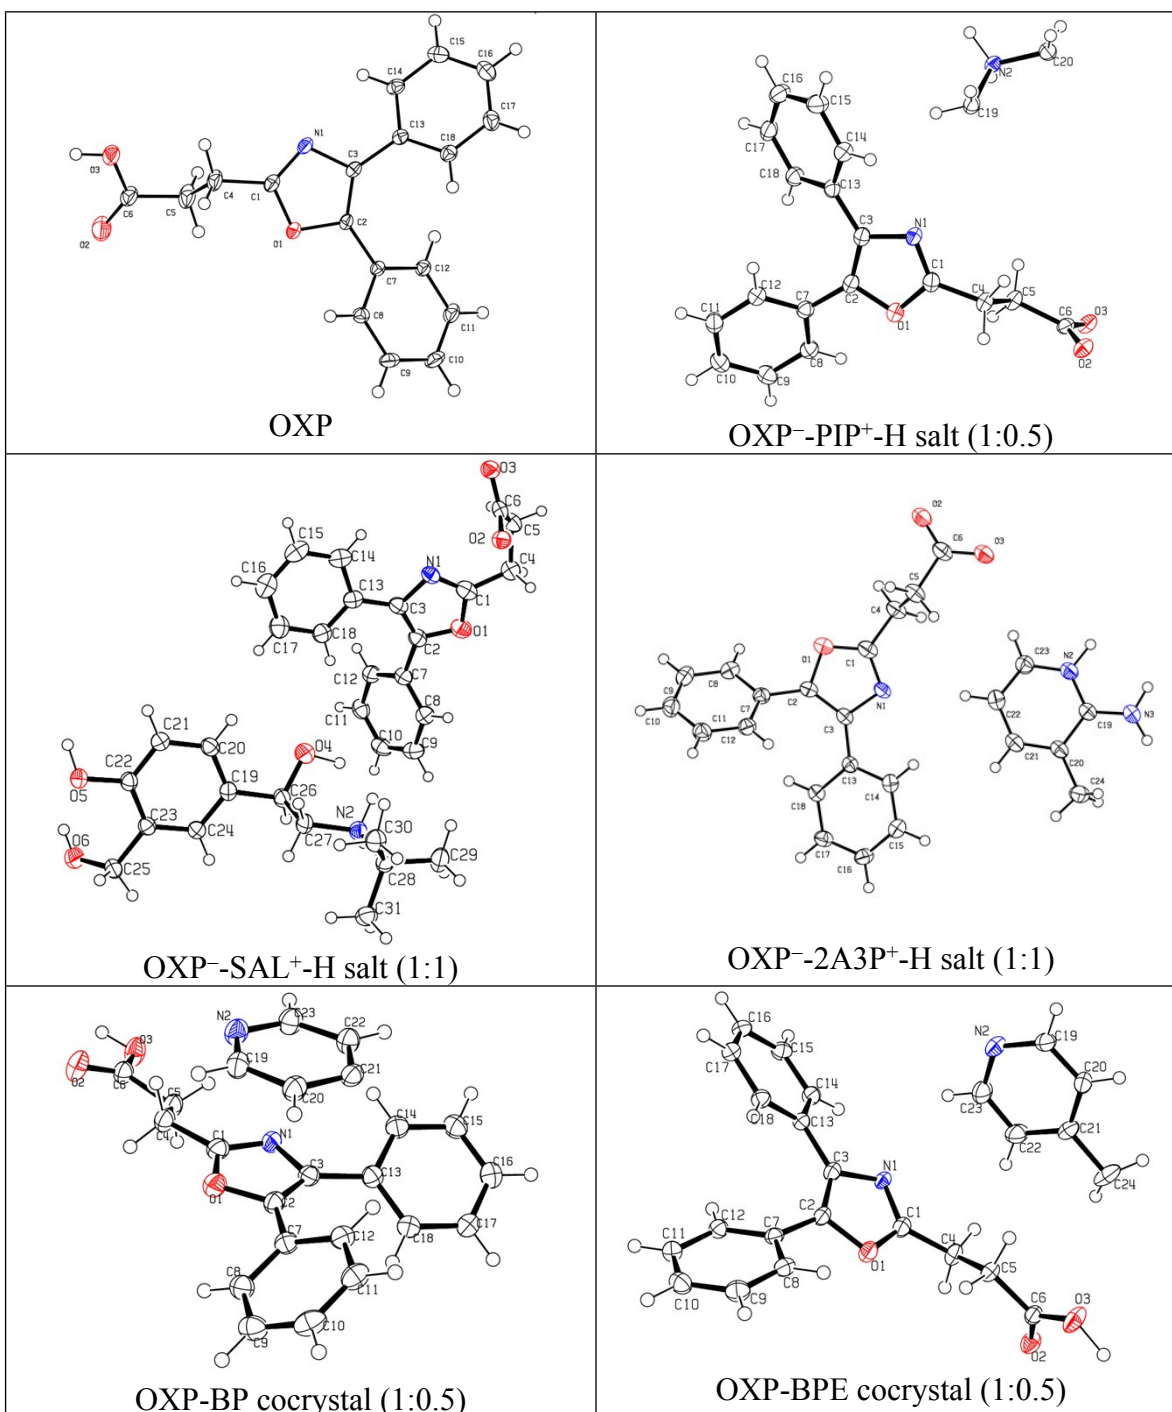

**Figure S1.** ORTEP drawings of the components of OXP and its salts and cocrystals. Thermal ellipsoids are drawn in 50 % probability.

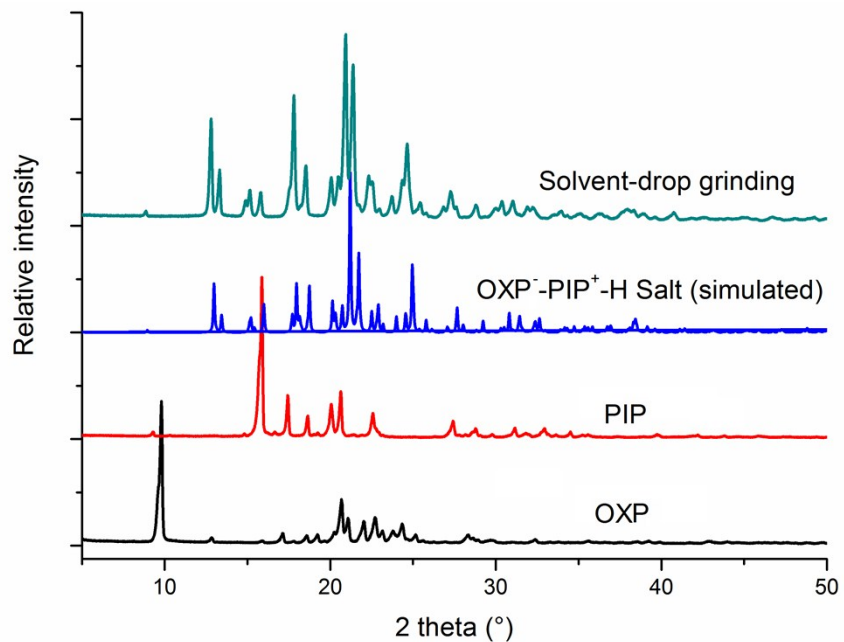

**Fig. S2** Comparison of the PXRD pattern of the product obtained from solvent-drop grinding of OXP and PIP with simulated powder pattern of OXP<sup>-</sup>-PIP<sup>+</sup>-H salt.

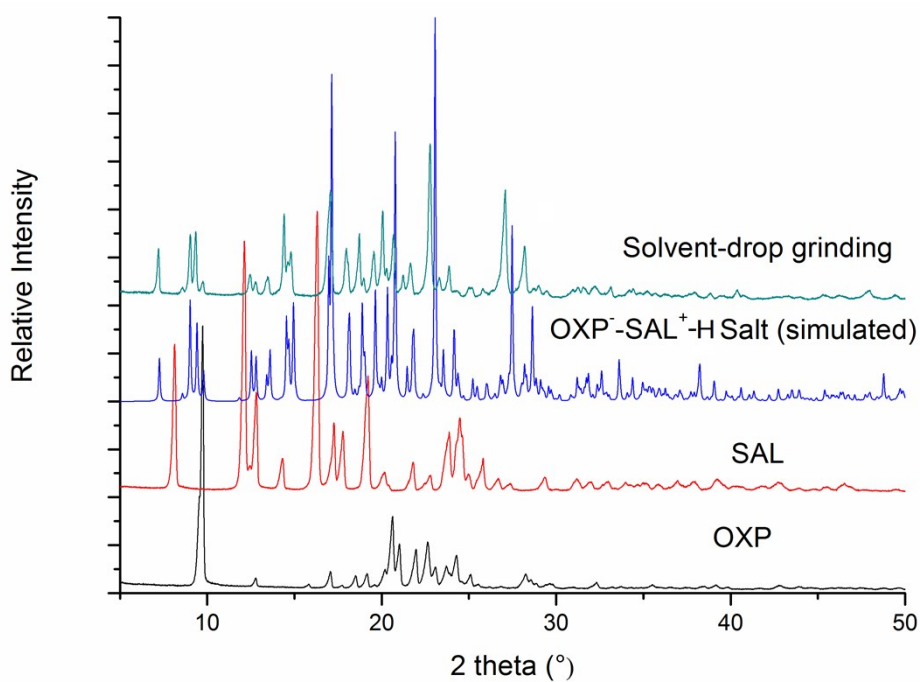

**Fig. S3** Comparison of the PXRD pattern of the product obtained from solvent-drop grinding of OXP and SAL with simulated powder pattern of OXP<sup>-</sup>-SAL<sup>+</sup>-H salt.

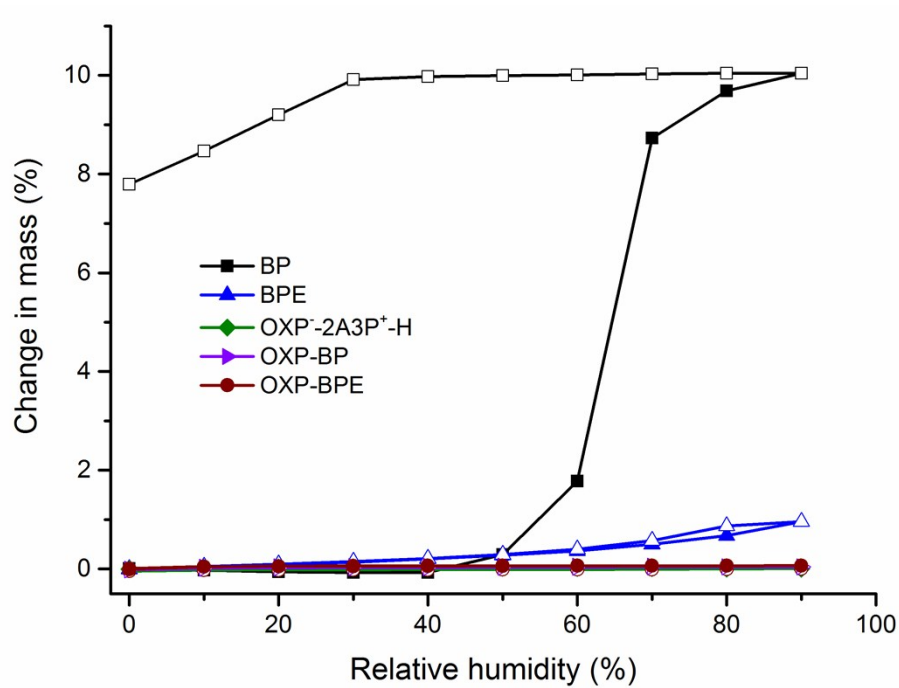

**Fig. S4** DVS profiles of BP, BPE, OXP-BP, OXP-BPE, and OXP<sup>-</sup>-2A3P<sup>+</sup>-H salt. Note that 2A3P is a liquid at 30 °C and hence not analyzed by DVS.

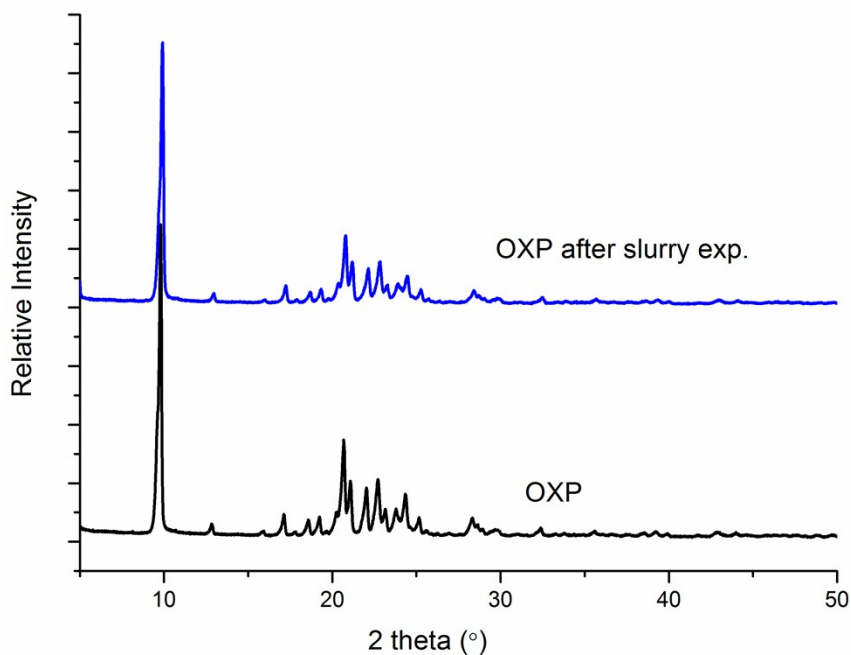

**Fig. S5** Comparison of the PXR D pattern of the product obtained from slurry experiment using OXP with PXR D pattern of OXP.

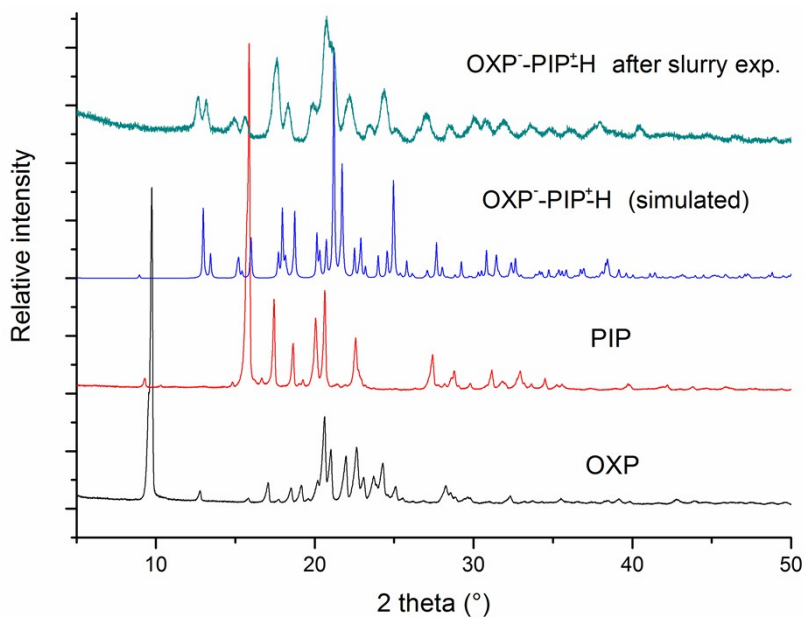

**Fig. S6** Comparison of the PXRD pattern of the product obtained from slurry experiment using  $\text{OXP}^-$ - $\text{PIP}^+$ -H salt with PXRD patterns of OXP, PIP, and simulated PXRD pattern of  $\text{OXP}^-$ - $\text{PIP}^+$ -H salt.

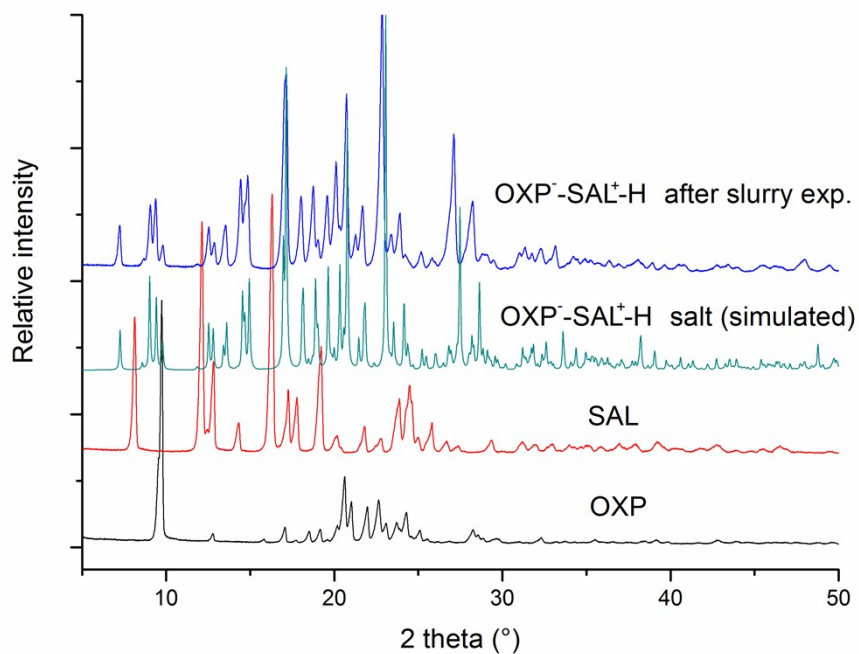

**Fig. S7** Comparison of the PXRD pattern of the product obtained from slurry experiment using  $\text{OXP}^-$ - $\text{SAL}^+$ -H salt with PXRD patterns of OXP, SAL, and simulated PXRD pattern of  $\text{OXP}^-$ - $\text{SAL}^+$ -H salt.

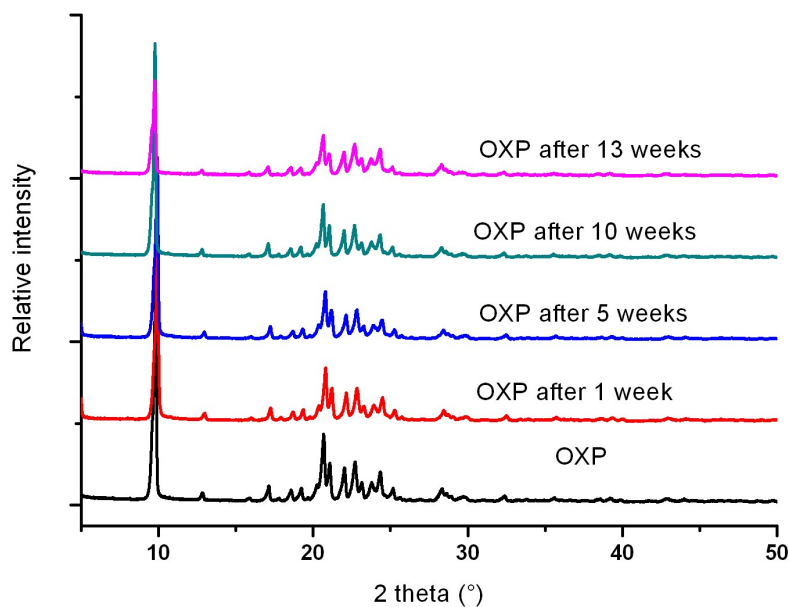

**Fig. S8** Comparison of the PXRD patterns of the products obtained from stability experiments at accelerated conditions (40 °C, 75 % relative humidity) using OXP with PXRD pattern of OXP.

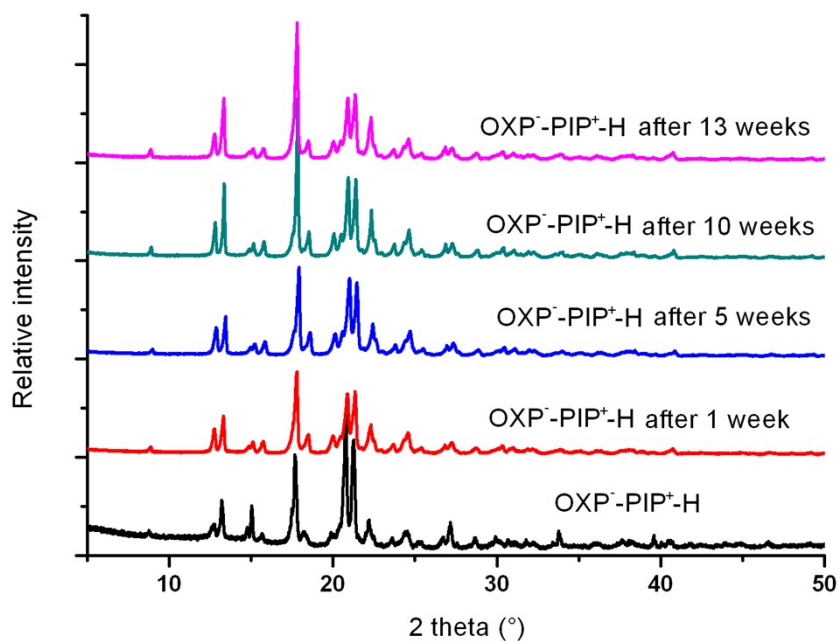

**Fig. S9** Comparison of the PXRD patterns of the products obtained from stability experiments at accelerated conditions (40 °C, 75 % relative humidity) using OXP<sup>-</sup>-PIP<sup>+</sup>-H salt with PXRD patterns of OXP, PIP, and simulated PXRD pattern of OXP<sup>-</sup>-PIP<sup>+</sup>-H salt.

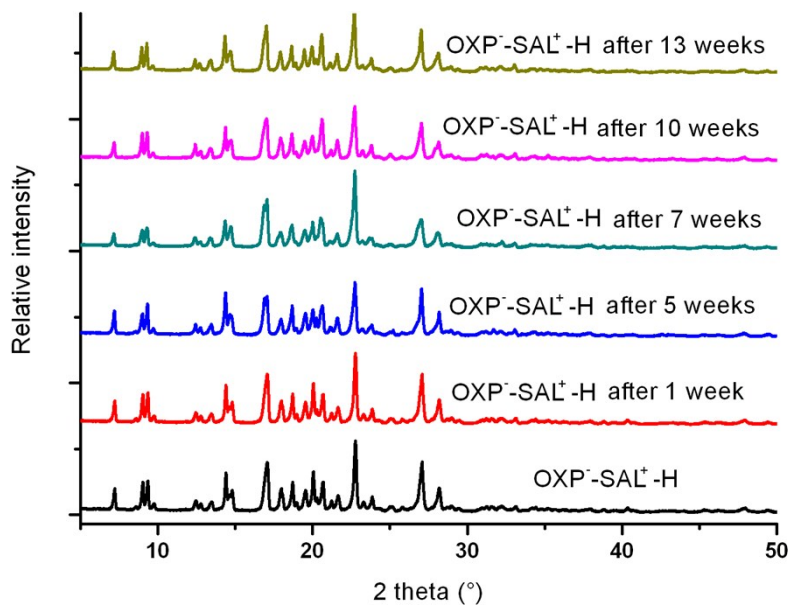

**Fig. S10** Comparison of the PXRD patterns of the products obtained from stability experiments at accelerated conditions (40 °C, 75 % relative humidity) using OXP<sup>-</sup>-SAL<sup>+</sup>-H salt with PXRD patterns of OXP, SAL, and simulated PXRD pattern of OXP<sup>-</sup>-SAL<sup>+</sup>-H salt.

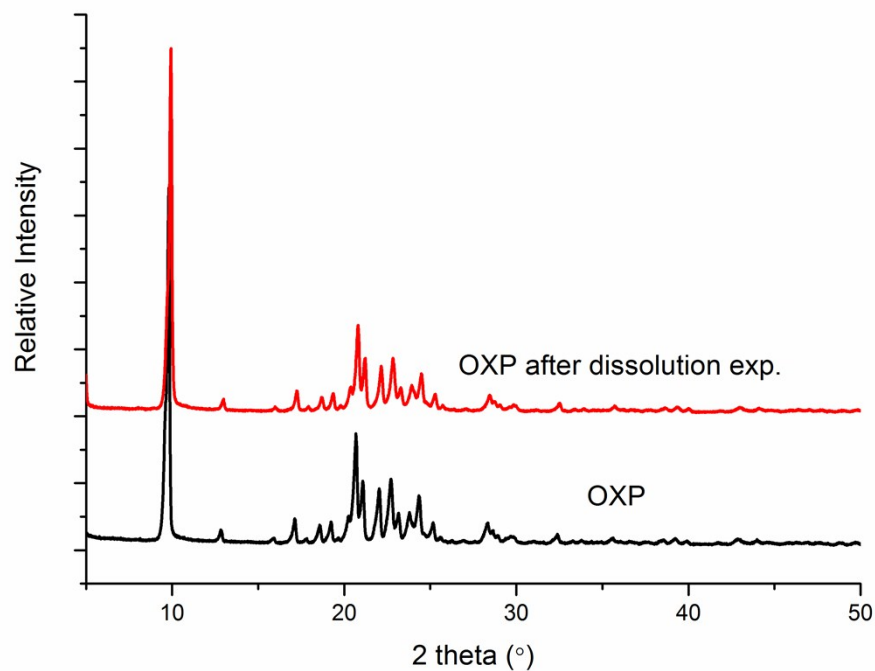

**Fig. S11** Comparison of the PXRD pattern of the product obtained from dissolution experiment using OXP with PXRD pattern of OXP.

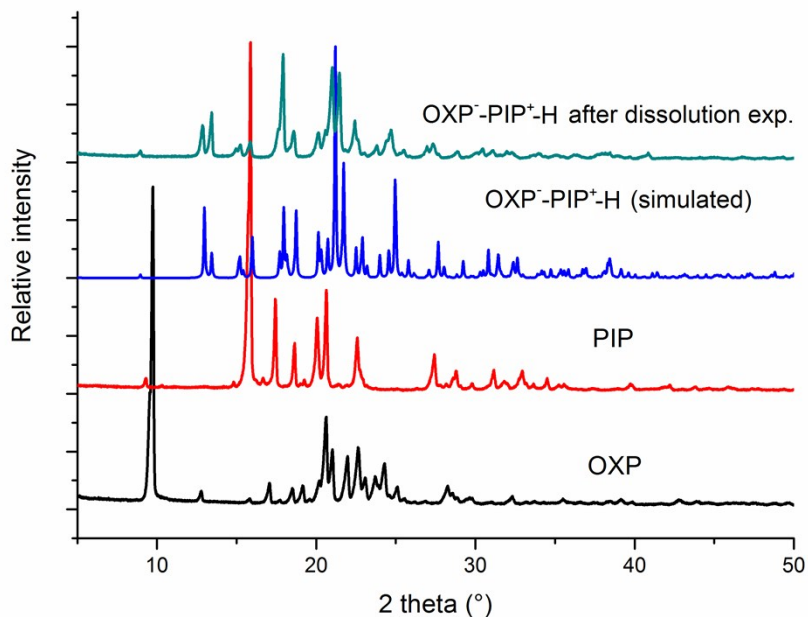

**Fig. S12** Comparison of the PXRD pattern of the product obtained from dissolution experiment using  $\text{OXP}^-$ - $\text{PIP}^+$ -H salt with PXRD patterns of OXP, PIP, and simulated PXRD pattern of  $\text{OXP}^-$ - $\text{PIP}^+$ -H salt.

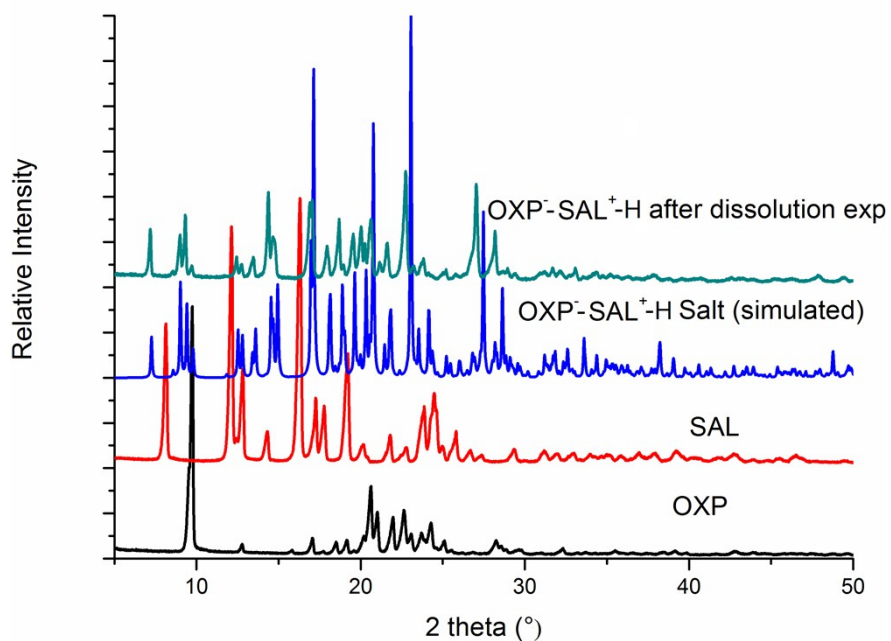

**Fig. S13** Comparison of the PXRD pattern of the product obtained from dissolution experiment using  $\text{OXP}^-$ - $\text{SAL}^+$ -H salt with PXRD patterns of OXP, SAL, and simulated PXRD pattern of  $\text{OXP}^-$ - $\text{SAL}^+$ -H salt.
